# Supplementary material for: Fabrication of Silk Hydrogel Scaffolds with Aligned Porous Structures and Tunable Mechanical Properties
Source: MDPI journal article supplement (doi:10.3390/gels9030181), 2023-02-24
Supplement: s1 [file s1]

## Supplementary Information for

# **Fabrication of Silk Hydrogel Scaffolds with Aligned Porous Structures and Tunable Mechanical Properties**

**Zewu Jiang<sup>1,2</sup>, Qingqing Sun<sup>3</sup>, Qian Li<sup>1,2\*</sup> and Xiaomeng Li<sup>1,2\*</sup>**

<sup>1</sup> School of Mechanics and Safety Engineering, Zhengzhou University, Zhengzhou 450001, China

<sup>2</sup> National Center for International Joint Research of Micro-nano Moulding Technology, Zhengzhou University, Zhengzhou 450001, China

<sup>3</sup> School of Materials Science and Engineering, Zhengzhou University, Zhengzhou 450001, China

\* Correspondence: xiaomeng.li@zzu.edu.cn; qianli@zzu.edu.cn

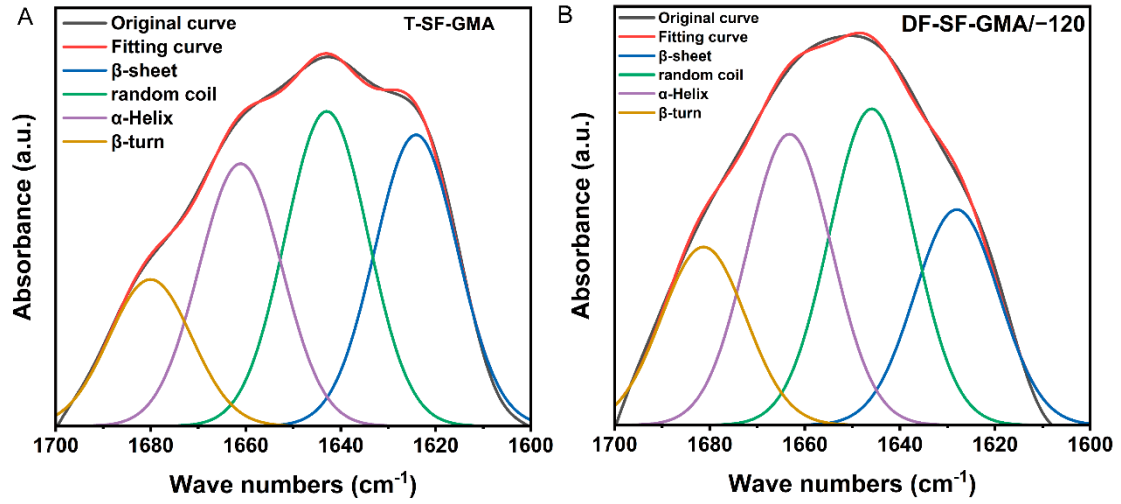

Figure S1. The deconvolution of FTIR spectra for the amide I band for (A) T-SF-GMA and (B) DF-SF-GMA/-120 hydrogels.

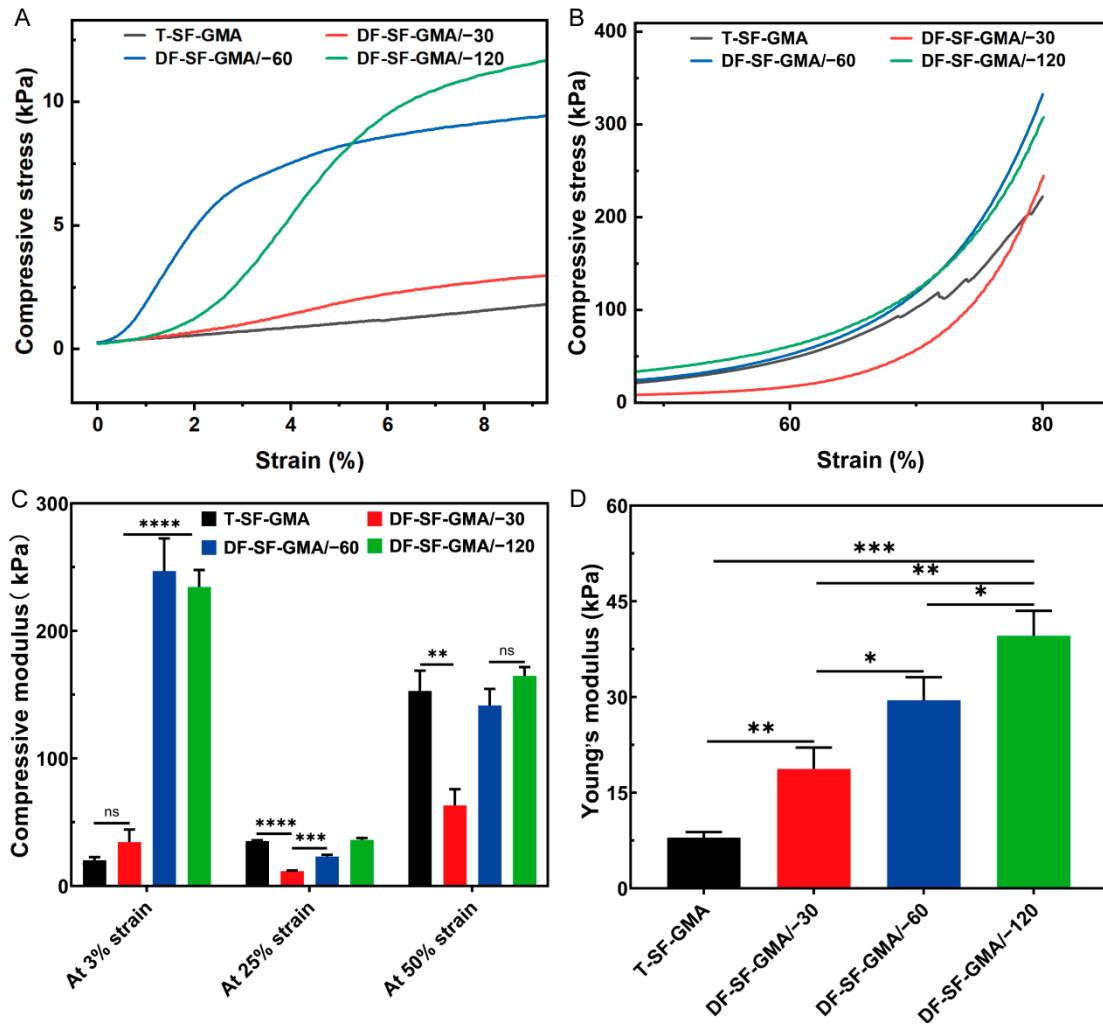

Figure S2. Physical properties of DF-SF-GMA hydrogels. The compressive stress-strain curves at early (A) and late stage (B). (C) The compressive modulus of all the hydrogels at different strains. The compressive modulus of DF-SF-GMA/-60 and DF-SF-GMA/-120 were much

higher than other groups. (D) Tensile elastic modulus of T-SF-GMA and DF-SF-GMA hydrogels (\*  $P < 0.05$ ; \*\*  $P < 0.01$ ; \*\*\*  $P < 0.001$ ; and \*\*\*\*  $P < 0.0001$ ,  $n = 3$ ).

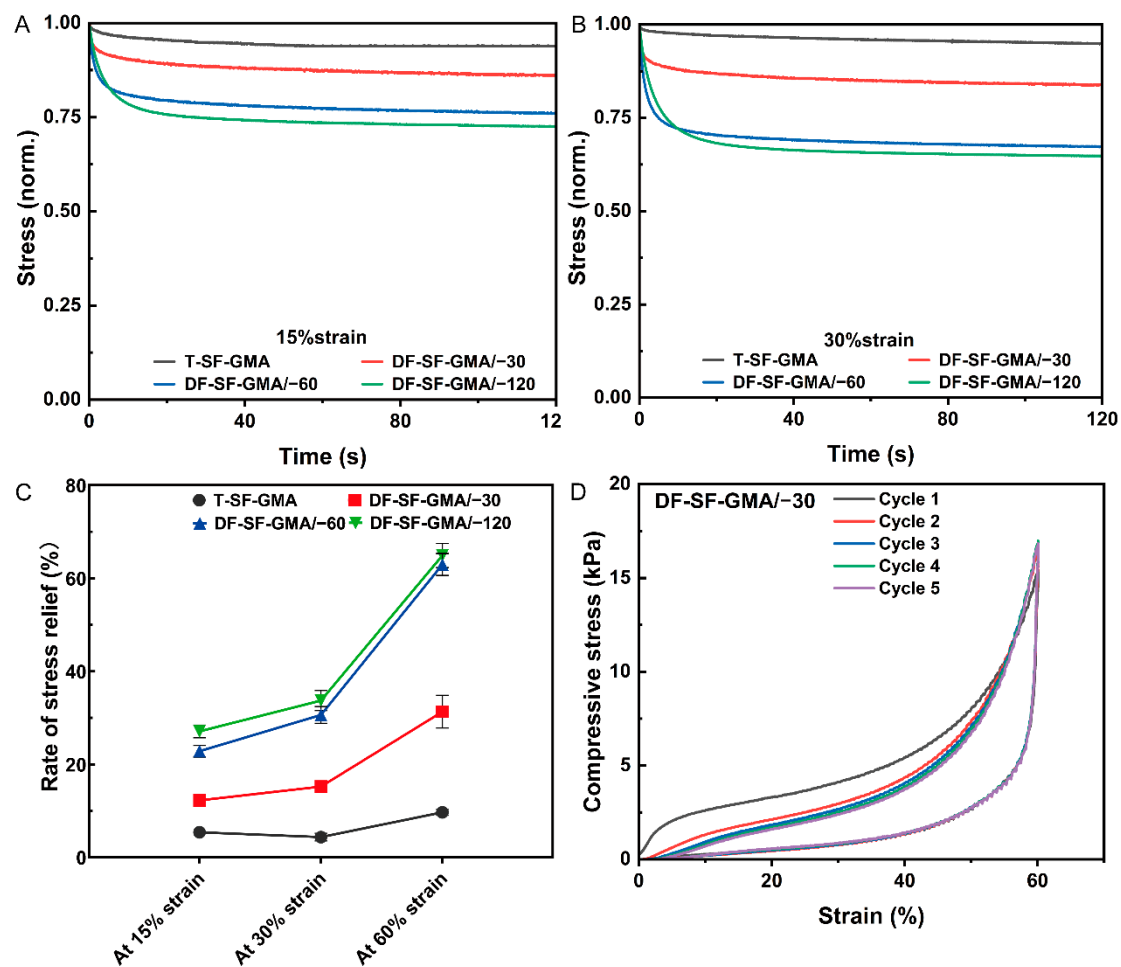

Figure S3. Viscoelastic properties of T-SF-GMA and DF-SF-GMA hydrogels. Stress relaxation test of T-SF-GMA and DF-SF-GMA hydrogels at a strain of (A) 15% and (B) 30%. Stress is normalized by the initial stress. (C) The ratio of relaxed stress to initial stress at 60 s. (D) Cyclic compression test of DF-SF-GMA/-30 hydrogels under 60% strain.
